## CLINICAL REPORTS

Ronald D. Miller, M.D., Editor

Anesthesiology  
57:44-46, 1982

### The Effectiveness of Sodium Citrate as an Antacid

CHARLES P. GIBBS, M.D.,\* LYNN SPOHR, C.R.N.A.,† DONALD SCHMIDT, M.D.‡

Vomiting or regurgitation of stomach contents and subsequent aspiration during administration of general anesthesia continue to be a leading cause of maternal mortality. Reports from England and Wales indicate that aspiration is the major preventable cause of maternal death during cesarean section.<sup>1</sup> Because aspiration of acidic gastric contents is more harmful than aspiration of nonacidic contents,<sup>2-4</sup> prophylactic administration of antacids has been recommended to decrease gastric acidity.<sup>5</sup> Although antacids are effective, we have shown in dogs that particulate antacids, if aspirated, can produce harmful physiologic and histologic changes.<sup>4</sup> However, sodium citrate, a nonparticulate antacid, is essentially harmless when aspirated, producing only transient hypoxia and minimal tissue changes.<sup>6</sup> Although sodium citrate has been recommended previously for decreasing gastric acidity before general anesthesia,<sup>7,8</sup> the effectiveness of this antacid has been questioned.<sup>9</sup> Also, most reports concerning its use have appeared in England rather than America.<sup>7-9</sup> Thus, we thought it appropriate to reevaluate the effectiveness of sodium citrate for patients undergoing cesarean section. Also, because this agent's potential for elevating the pH of large volumes of acidic liquid might not be apparent clinically, we determined this potential *in vitro* and compared the results with results obtained from similar experiments utilizing two particulate antacids.

#### METHODS

At intervals ranging from 10 to 47 min before the induction of anesthesia, 30 ml chilled (more palatable) sodium citrate was given to 26 patients scheduled for elective cesarean section. None were in labor and all had fasted overnight. After the induction of anesthesia and endotracheal intubation, a Salem sump tube was placed in the stomach and its contents aspirated through one lumen immediately and through the other just before extubation. The first samples were obtained 12-50 min after the ingestion of the antacid and the second samples 58-195 min after ingestion. The volume and the pH of each sample were measured and recorded. The pH was measured with an Orion® digital ionalyzer pH meter and electrode. Mean pH was calculated by adding all values and dividing by the number of samples.<sup>10</sup> The 0.3 M sodium citrate mixture was prepared by the hospital pharmacy according to the following formula: 88.2 g sodium citrate; 100 ml simple syrup; 1.0 ml mint flavor; and 1,000 ml H<sub>2</sub>O q.s. The protocol was approved by the Human Experimentation Committee of the University of Florida and informed consent was obtained from each patient.

The *in vitro* portion of the experiment was accomplished by adding hydrochloric acid incrementally to 30 ml each of 0.3 M of sodium citrate, Kolantyl Gel®, and Mylanta®. The latter two antacids are commercially available particulate antacids. The experiment was performed by using hydrochloric acid with three different pH values: 0.8, 1.0, and 1.5.

#### RESULTS

Sodium citrate, 30 ml, elevated the pH of the gastric contents to above 2.5 for all 26 patients at the time of the first sample and for 25 of the 26 patients at the time of the second sample. The lowest pH in the first sample was 3.2 and the lowest in the second sample was 1.8. The means of the two samples were 5.7 and 5.2, respectively. The volumes, including the total of the first and second samples, ranged from 6 ml to 110 ml. All aspirates were liquid, *i.e.*, they contained no partially

\* Professor of Anesthesiology and of Obstetrics and Gynecology, University of Florida College of Medicine.

† Nurse Anesthetist, University of Florida College of Medicine.

‡ Resident, Department of Obstetrics and Gynecology, St. Francis Hospital, Peoria, Illinois.

Received from the Departments of Anesthesiology and of Obstetrics and Gynecology, the University of Florida College of Medicine, Gainesville, Florida. Accepted for publication January 11, 1982. Presented in part at the scientific session of the annual meeting of the American Society of Anesthesiologists, New Orleans, Louisiana, October 1981.

Address reprint requests to Dr. Gibbs: Department of Anesthesiology, Box J-254, J. Hillis Miller Health Center, Gainesville, Florida 32610.

Key words: Anesthesia: complications; obstetric. Complications: aspiration. Gastrointestinal tract: stomach.

TABLE 1. Mean Values of Gastric Samples after Intubation (1st Sample) and before Extubation (2nd Sample) Following Preinduction Administration of 30 ml 0.3 M Sodium Citrate

|       | 1st Sample    |         |                | 2nd Sample    |         |                | Total<br>Volume (ml) |
|-------|---------------|---------|----------------|---------------|---------|----------------|----------------------|
|       | Time<br>(min) | pH      | Volume<br>(ml) | Time<br>(min) | pH      | Volume<br>(ml) |                      |
| Mean  | 26.7          | 5.7     | 26.3           | 80.7          | 5.3     | 27.8           | 54.1                 |
| SD    | 10.3          | 0.9     | 22.6           | 35.3          | 1.4     | 22.0           | 32.0                 |
| Range | 12-50         | 3.2-7.1 | 7-80           | 58-195        | 1.8-7.0 | 6-90           | 17-110               |

digested food. The data are presented and summarized in table 1.

Results of the *in vitro* study revealed that sodium citrate can elevate pH of larger amounts of hydrochloric acid to above 2.5 than either of the two particulate antacids. Numerical values are presented in table 2.

### DISCUSSION

Patients undergoing general anesthesia are most susceptible to hazards of aspiration during induction just before intubation and during emergence just after extubation. Our data indicate that 30 ml of 0.3 M sodium citrate administered before the induction of general anesthesia will maintain the pH of liquid gastric contents above 2.5 in nearly all patients throughout the operation. These data support those of Lahiri and colleagues<sup>7</sup> as well as of Holdsworth *et al.*,<sup>8</sup> but are at odds with the work of Hester and Heath.<sup>9</sup>

These latter authors reported that sodium citrate did not elevate the pH of gastric contents to above 2.5 consistently. That we achieved better results than Hester and Heath may be explained by the fact that we administered 30 ml of antacid rather than 15 ml. We chose 30 ml because it is the amount of particulate antacid that we have always administered to our patients, as have others.<sup>11</sup> Also, since we administered our antacid before entering the delivery room and since patients moved from the stretcher to the operating table, the movement may have agitated the stomach enough to mix its contents and the antacid thoroughly. That such might be the case is supported by a recent study of Holdsworth and colleagues who found that mixing sodium citrate with stomach contents was enhanced considerably by rotating the patient from supine to left lateral position and, even more, by rotating the patient 360°.<sup>8</sup>

The largest volume of stomach contents encountered in this study was 110 ml. However, because sampling through a nasogastric tube does not ensure retrieval of all material, it is likely that larger volumes were there. Even if larger amounts were present, our *in vitro* data indicate that 30 ml of 0.3 M sodium citrate can elevate the pH of large quantities of highly acidic contents to above 2.5. Thus, sodium citrate should be an effective antacid when administered prophylactically before ce-

sarean section to patients who have not eaten solid foods recently.

Whether sodium citrate, or any antacid, effectively elevates pH of partially digested food is not answered. However, we have preliminary data indicating that the combination of sodium citrate plus partially digested food is a much more benign aspirate in the dog than the combination of a particulate antacid plus partially digested food.<sup>12</sup>

Since it is well-established that a significant number of patients undergoing elective cesarean section have gastric contents with a pH less than 2.5, we did not believe control samples of gastric contents for pH measurements were necessary. Sixty-six per cent of patients undergoing elective cesarean section in both the studies of Baraka and colleagues and of Roberts and Shirley were found to have stomach contents with a pH less than 2.5.<sup>5,13</sup> Furthermore, we did not wish to deny our patients the benefit of antacid prophylaxis to reestablish control values.

We have shown that 30 ml of 0.3 M sodium citrate effectively elevates the pH of liquid stomach contents in patients undergoing cesarean section. Although the administration of this antacid can reduce the severity of aspiration should it occur, the prevention of aspiration lies in the more liberal use of regional anesthesia as well as in the strict adherence to established methods of inducing anesthesia in patients whose stomachs are not empty. Furthermore, because the aspiration of partially digested food is particularly damaging to the lungs,<sup>14</sup> it is imperative for anesthesiologists and obstetricians to warn patients before they enter the hospital about the hazards of eating before delivery and to advise them not to do so.

TABLE 2. Volume (ml) of HCl (pH 0.8, 1.0, and 1.5) Neutralized by 30 ml 0.3 M Sodium Citrate, Kolantyl Gel®, and Mylanta®

| pH*                  | Hydrochloric Acid |     |     |
|----------------------|-------------------|-----|-----|
|                      | 0.8               | 1.0 | 1.5 |
| Sodium Citrate (8.5) | 140               | 255 | 750 |
| Kolantyl Gel® (8.1)  | 100               | 160 | 360 |
| Mylanta® (8.0)       | 75                | 100 | 300 |

\* Initial values for each antacid are in parentheses.

## REFERENCES

1. Tomkinson J, Turnbull A, Robson G, et al: Report on Confidential Enquiries into Maternal Deaths in England and Wales 1973-1975. London, Her Majesty's Stationery Office, 1980
2. Mendelson CL: The aspiration of stomach contents into the lungs during obstetric anesthesia. *Am J Obstet Gynecol* 52:191-205, 1946
3. Teabeaut JR II: Aspiration of gastric contents—an experimental study. *Am J Pathol* 28:51-67, 1952
4. Gibbs CP, Schwartz DJ, Wynne JW, et al: Antacid pulmonary aspiration in the dog. *ANESTHESIOLOGY* 51:380-385, 1979
5. Roberts RB, Shirley MA: Reducing the risk of acid aspiration during cesarean section. *Anesth Analg (Cleve)* 53:859-868, 1974
6. Gibbs CP, Hempling RE, Wynne JW, et al: Antacid pulmonary aspiration (Abstract). *ANESTHESIOLOGY* 51:S290, 1979
7. Lahiri SK, Thomas TA, Hodgson RMH: Single-dose antacid therapy for the prevention of Mendelson's syndrome. *Br J Anaesth* 45:1143-1146, 1973
8. Holdsworth JD, Johnson K, Mascal G, et al: Mixing of antacids with stomach contents. Another approach to the prevention of the acid aspiration (Mendelson's) syndrome. *Anaesthesia* 35:641-650, 1980
9. Hester JB, Heath ML: Pulmonary acid aspiration syndrome: Should prophylaxis be routine. *Br J Anaesth* 49:595-599, 1977
10. Kamaya H, Mashimo T, Ueda I: pH average rebuttal. Letter to the Editor. *ANESTHESIOLOGY* 52:449-450, 1980
11. Burgess GE III: Antacids for obstetric patients. *Am J Obstet Gynecol* 123:577-579, 1975
12. Gibbs CP, Kuck EJ, Hood IC, et al: Antacid plus foodstuff aspiration in the dog (Abstract). *ANESTHESIOLOGY* 53:S307, 1980
13. Baraka A, Saab M, Salem MR, et al: Control of gastric acidity by glycopyrrrolate premedication in the parturient. *Anesth Analg (Cleve)* 56:642-645, 1977
14. Schwartz DJ, Wynne JW, Gibbs CP, et al: The pulmonary consequences of aspiration of gastric contents at pH values greater than 2.5. *Am Rev Respir Dis* 121:119-126, 1980

Anesthesiology  
57:46-47, 1982

## Causalgia of Vascular Etiology Following an Abdominal Injury

MARCOS SZEINFELD, M.D.,\* ROBERTO SAUCEDO, M.D.,† VICENTE S. PALLARES, M.D.‡

Causalgia is a pain syndrome characterized by chronic, severe, constant, burning pain which frequently is associated with vasomotor disturbances, delayed return of function, and trophic changes.<sup>1</sup> Major causalgia is often seen following penetration of the body by a high-velocity projectile, near or through peripheral nerves in the upper or lower extremity.

An unusual case of severe causalgia affecting the lower extremity secondary to a gunshot wound to the abdomen is described. The uniqueness of this case was the early development of symptoms of causalgia following vascular abdominal trauma with complete absence of peripheral nerve injury.

## REPORT OF A CASE

A 21-year-old, healthy man was admitted for a gunshot wound to the abdomen. A 38-caliber bullet entered the right upper quadrant and traveled in a downward direction from right to left and front to back. The exit of the wound was located 1 cm above the left iliac crest at the level of the posterior axillary line.

The patient arrived at the Emergency Room in critical condition and underwent an emergency exploratory laparotomy which included resection of the third and fourth portion of the duodenum, repair of the superior mesenteric vein, and repair of an extensive injury to the aorta below the renal arteries. After surgery, the patient was transferred to the Surgical Intensive Care Unit in stable condition. The postoperative course was uneventful until the fifth day, when he began to complain of burning pain in the left buttock and left leg. Within five days, the pain became unbearable and could not be relieved completely with narcotic analgesics. Four weeks after the accident, the patient was referred to the Pain Clinic for evaluation of the persistent pain. Prior to our consultation, a pseudoaneurysm of the abdominal aorta was ruled out.

When the patient was first seen, the pain was severe, and he would not allow anyone to touch the affected part. The pain was constant and characterized as pulsatile and burning in nature, radiating from the left buttock toward the posterior aspect of the left thigh and calf through the plantar aspect of the foot. The pain was exacerbated with heat and when lying in the right lateral decubitus, but some relief was obtained in the left lateral decubitus position.

On physical examination he was uncooperative, irritable, and extremely anxious. The skin of the left leg was cold and moist with no atrophic changes. The neurological examinations before and after the treatment did not show any sensory or motor deficits. The rest of the examination was within normal limits. A diagnosis of causalgia was made, and a diagnostic left lumbar sympathetic nerve block was carried out the same day. A 22-gauge needle was inserted 5 cm lateral to the L2 spine, and 15 ml of bupivacaine 0.25 per cent was injected. The pain disappeared almost completely within a few minutes after the block, and the extremity became warm and dry. There was an average increase of 5° C in the skin temperature in the left toes. The effect of the block lasted for over 10 hours. This procedure was repeated twice with the same results. As symptoms recurred after each block dissipated, and as the intervals between each block did not increase, the patient was advised to have a left lumbar sympathectomy to obtain

\* Assistant Professor of Anesthesiology.

† Fellow of Anesthesiology.

‡ Professor of Anesthesiology.

Received from the Department of Anesthesiology and Pain Clinic, University of Miami School of Medicine, P. O. Box 016370-R-370, Miami, Florida 33101. Accepted for publication January 13, 1982.

Address reprints request to Dr. Marcos Szeinfeld.

Key words: Anesthetic techniques, regional: lumbar sympathetic. Sympathetic nervous system: causalgia. Anesthesia: diagnostic, therapeutic.
